# Supplementary material for: New Standards for Clinical Decision Support: A Survey of The State of Implementation
Source: PubMed Central journal article supplement — Yearb Med Inform. 2021 Sep 3;30(1):159–71. doi: 10.1055/s-0041-1726502 (PMC8416232; doi:10.1055/s-0041-1726502), 2021-09-03
Supplement: 10-1055-s-0041-1726502-staber.pdf [file 10-1055-s-0041-1726502-staber.pdf]

## Supplemental Table 1: Data extraction field definitions.

| Field Group                        | Field                                                       | Field Definition                                                                       |
|------------------------------------|-------------------------------------------------------------|----------------------------------------------------------------------------------------|
| <b>General Article Information</b> | PMID                                                        | PubMed Identifier                                                                      |
|                                    | Title                                                       | Article title                                                                          |
|                                    | Year                                                        | Year of publication                                                                    |
|                                    | Article Type                                                | Type of article, as classified by the publishing journal                               |
|                                    | Article Primary Focus/Objective                             | Description of article's objective                                                     |
|                                    | Decision/Workflow Supported                                 | Description of the clinical decision or workflow supported by the technology described |
|                                    | Country of Implementation                                   | Country or countries where technology is being built or implemented                    |
|                                    | EHR(s) Targeted                                             | EHR(s) in which technology was tested or deployed                                      |
|                                    | Clinical Setting                                            | Whether technology developed is intended for inpatient, outpatient or both settings    |
|                                    | Clinical Domain                                             | Clinical domain or specialty in which technology is intended to be used                |
| <b>Standards Used</b>              | Provider or Patient Facing                                  | Whether the technology is intended to be used by providers, patients, or both          |
|                                    | Design Stage                                                | Whether technology is in design phase, piloting phase, or deployed                     |
|                                    | FHIR                                                        | Presence or absence of FHIR                                                            |
|                                    | SMART                                                       | Presence or absence of SMART                                                           |
| <b>CDS Elements</b>                | CQL                                                         | Presence or absence of CQL                                                             |
|                                    | CDS Hooks                                                   | Presence or absence of CDS Hooks                                                       |
|                                    | Alerts/Notifications                                        | Presence or absence of alerts or notifications in a CDS                                |
|                                    | Relevant Information Display                                | Presence or absence of relevant information display in a CDS                           |
|                                    | Order facilitators                                          | Presence or absence of order facilitators in a CDS                                     |
|                                    | Reference Information/Guidance                              | Presence or absence of reference information or guidance in a CDS                      |
|                                    | Workflow/Protocol Pathway Support                           | Presence or absence of workflow or protocol pathway support in a CDS                   |
| Document Forms/Templates           | Presence or absence of document forms or templates in a CDS |                                                                                        |

|                                    |                          |                                                                          |
|------------------------------------|--------------------------|--------------------------------------------------------------------------|
| <b>Evaluation</b>                  | Usability Evaluation     | Whether user satisfaction with the technology was evaluated              |
|                                    | Effectiveness Evaluation | Whether the impact of the technology in a clinical setting was evaluated |
|                                    | Study Design             | Type of study or studies used to evaluate the technology                 |
| <b>PICO [For Evaluations Only]</b> | Problem                  | Problem focus of proposed or developed technology                        |
|                                    | Intervention             | Type of technology                                                       |
|                                    | Comparison               | Study comparison or control                                              |
|                                    | Outcomes                 | Outcomes measured in evaluation of technology                            |
